# Supplementary material for: Long-Term Outcomes After Melody Transcatheter Pulmonary Valve Replacement in the US Investigational Device Exemption Trial
Source: PubMed Central journal article supplement — Circ Cardiovasc Interv. 2021 Dec 21;15(1):e010852. doi: 10.1161/CIRCINTERVENTIONS.121.010852 (PMC8765216; doi:10.1161/circinterventions.121.010852), 2021-12-21
Supplement: hcv-15-e010852-s001.pdf [file hcv-15-e010852-s001.pdf]

SUPPLEMENTAL MATERIAL to

Long-Term Outcomes After Melody Transcatheter Pulmonary Valve Replacement in the U.S.  
Investigational Device Exemption Trial

Thomas K. Jones, MD, Doff B. McElhinney, MD, Julie A. Vincent, MD, William E. Hellenbrand, MD,  
John P. Cheatham, MD, Darren P. Berman, MD, Evan M. Zahn, MD, Danyal M. Khan, MD, John F.  
Rhodes, Jr, MD, Shicheng Weng, MS, Lisa J. Bergersen, MD, MPH

## Supplemental Figures and Figure Legends

**Figure S1. Patient Flow.** Patient flow is depicted on the left. Cumulative patient exits are depicted in the column on the right. Patients were initially enrolled for 5 years or until the TPV was explanted. Two years after the final implant, the study protocol was modified. All active patients were approached to consent to an additional 5 years of follow-up (10 years total). Those who did not consent to longer-term follow-up, exited the study at that time (noted as “study completed”). EXP = explanted; W/D = withdrew; LTFU = lost to follow-up; Comp = study completed.

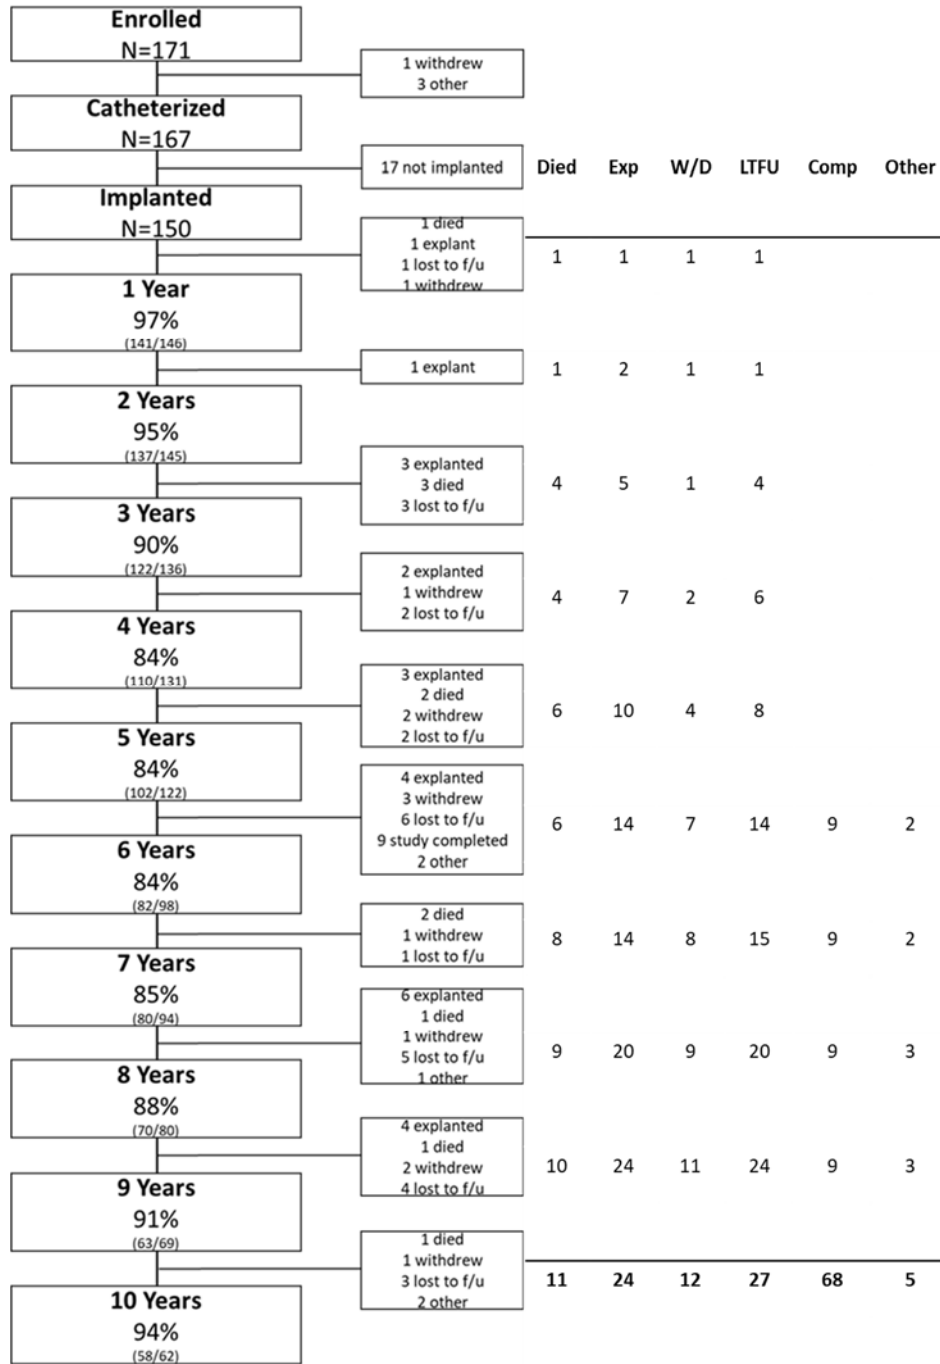

**Figure S2.** These Kaplan-Meier curves depict A) Freedom from any reintervention (all implanted vs. protected); B) Freedom from reoperation (all implanted vs. protected); A) Freedom from reintervention by age group. Kaplan-Meier event rates with [95% confidence intervals] are reported. Endpoint evaluated in patients implanted >24 hours. In (A) and (B), groups are not mutually exclusive.

A)

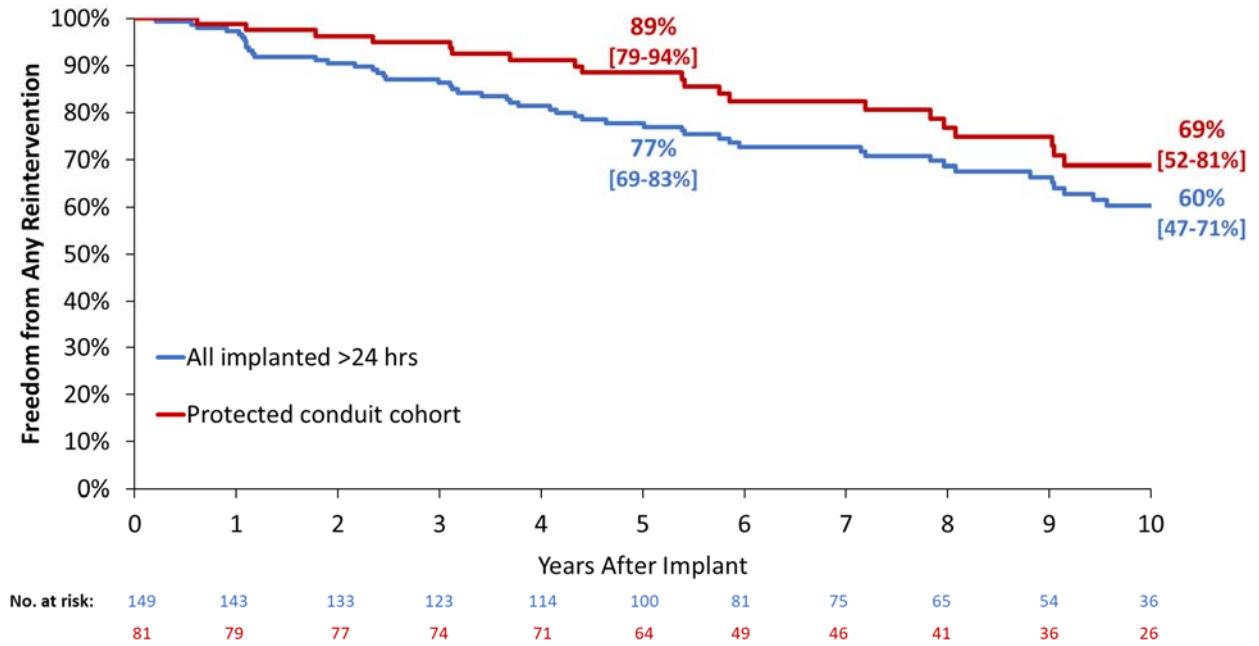

B)

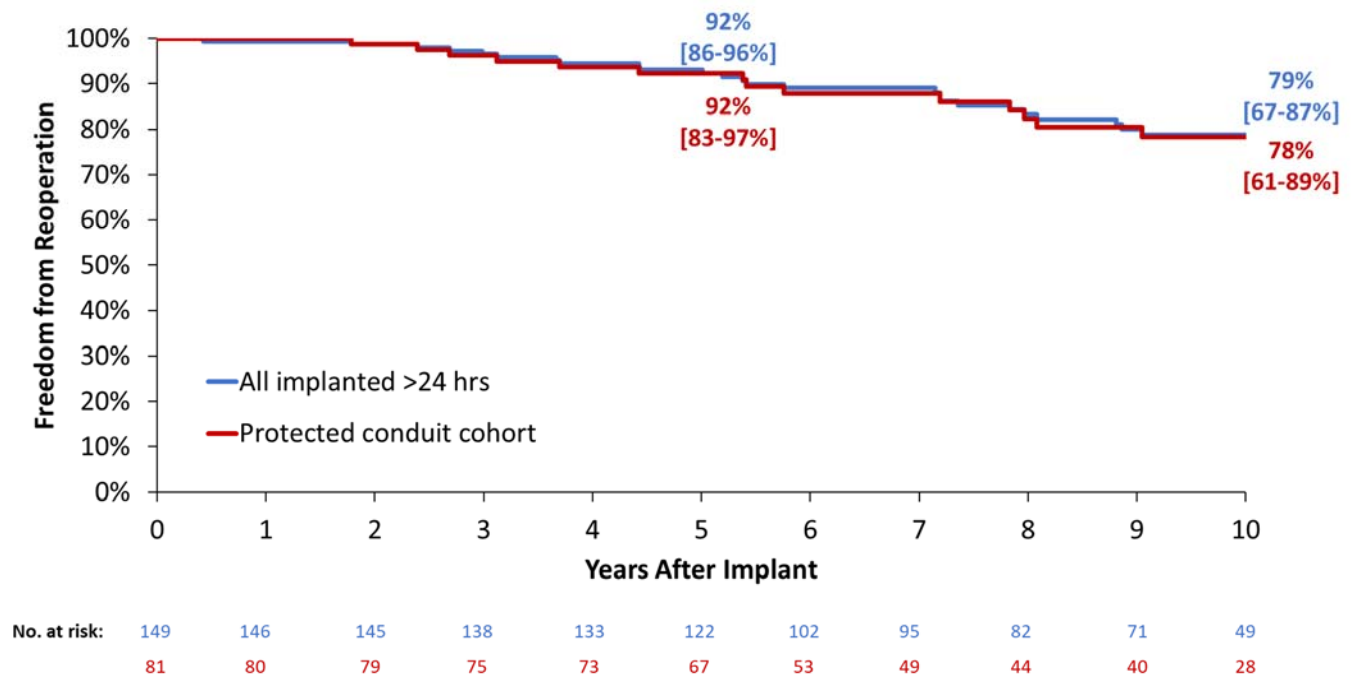

C)

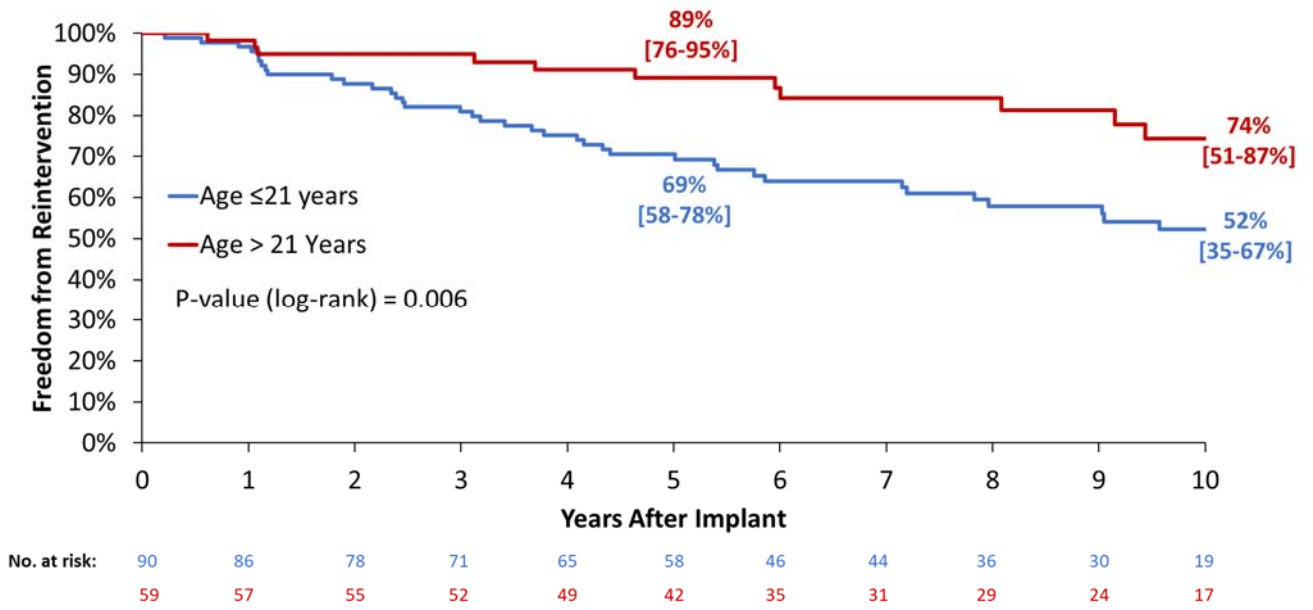

**Figure S3.** Kaplan-Meier curves depicting A) Freedom from endocarditis. Endocarditis was defined according to the modified Duke criteria; B) Freedom from major stent fracture, which was defined as a fracture requiring intervention to prevent permanent impairment of a body function or permanent damage to a body structure. Endpoint evaluated in patients implanted >24 hours. Rates are displayed with [95% confidence intervals].

A)

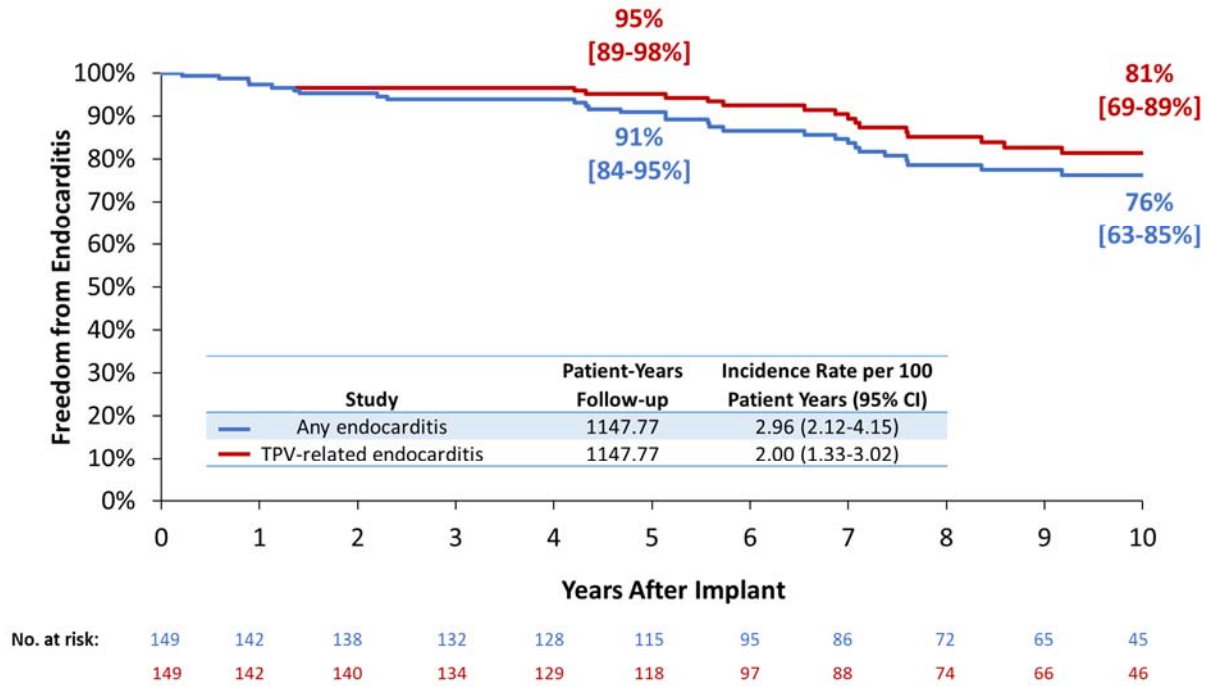

B)

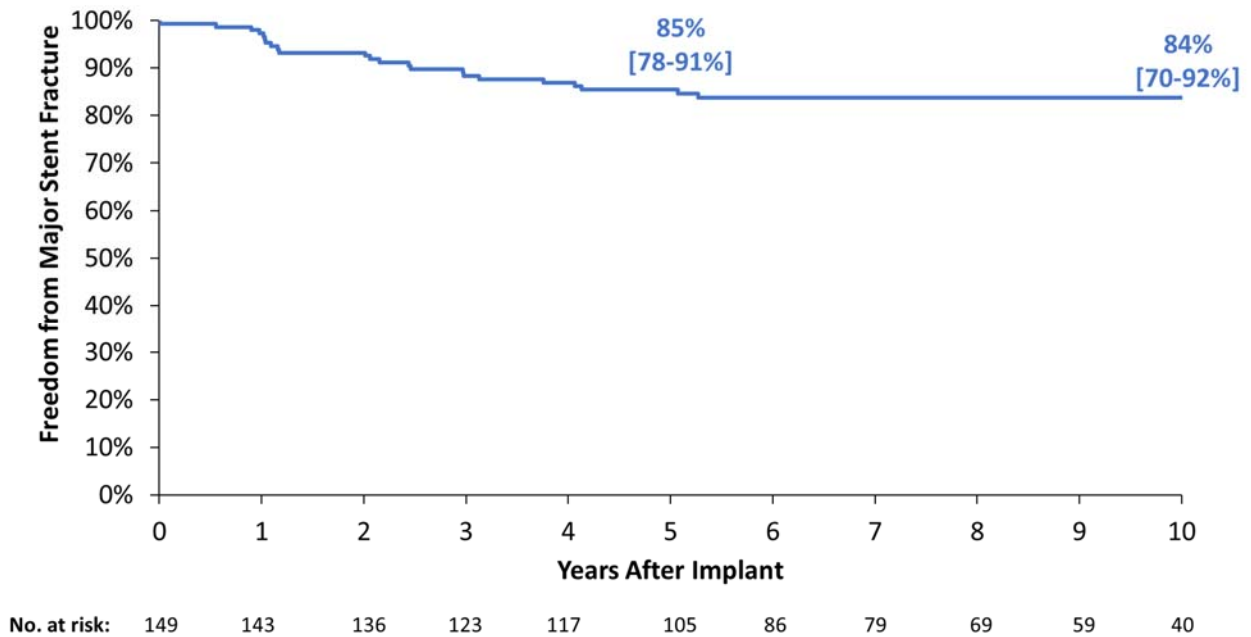

## Supplemental Tables

Table S1. Inclusion and Exclusion Criteria

|                                                                                                                                                                                                                                                                                                                                                                                                                                                                                                                                                                                                                                                                                                                                                                                                                                                                                                                                                                                                                                                                          |
|--------------------------------------------------------------------------------------------------------------------------------------------------------------------------------------------------------------------------------------------------------------------------------------------------------------------------------------------------------------------------------------------------------------------------------------------------------------------------------------------------------------------------------------------------------------------------------------------------------------------------------------------------------------------------------------------------------------------------------------------------------------------------------------------------------------------------------------------------------------------------------------------------------------------------------------------------------------------------------------------------------------------------------------------------------------------------|
| <p><b>Inclusion Criteria</b></p> <ul style="list-style-type: none"><li>• Age <math>\geq 5</math> years of age</li><li>• Weight <math>\geq 30</math> kilograms</li><li>• Existence of a full (circumferential) RVOT conduit that was <math>\geq 16</math> mm in diameter when originally implanted, or a stented bioprosthesis with a rigid circumferential sewing ring in the RVOT that has an internal diameter <math>\geq 18</math> mm and <math>\leq 22</math> mm when originally implanted</li><li>• Any of the following by transthoracic echocardiography<ul style="list-style-type: none"><li>For patients in NYHA Classification II, III, or IV:<ul style="list-style-type: none"><li>Moderate (3+) or severe (4+) pulmonary regurgitation, or</li><li>Mean RVOT gradient <math>\geq 35</math> mmHg.</li></ul></li><li>For patients in NYHA Classification I:<ul style="list-style-type: none"><li>Severe (4+) pulmonary regurgitation with RV dilatation or dysfunction, or</li><li>Mean RVOT gradient <math>\geq 40</math> mmHg.</li></ul></li></ul></li></ul> |
| <p><b>Exclusion Criteria</b></p> <ul style="list-style-type: none"><li>• Active endocarditis</li><li>• A major or progressive non-cardiac disease (e.g. liver failure, renal failure, cancer) that results in a life expectancy of <math>&lt; 1</math> year</li><li>• Patient or guardian unwilling or unable to provide written informed consent or comply with follow-up requirements</li><li>• Obstruction of the central veins (including the superior and inferior vena cava, bilateral iliac veins) such that the delivery system cannot be advanced to the heart via transvenous approach from either femoral vein or internal jugular vein</li><li>• Positive urine or serum pregnancy test 24 hours prior to procedure in female patients of child bearing potential</li><li>• Known intravenous drug abuse</li></ul>                                                                                                                                                                                                                                           |

Table S2. Baseline characteristics for all patients, patients implanted under the updated protocol, patients with a protected conduit, and according to the primary implant indication

| Variable                               |                                      |                                                    |                             | Primary Implant Indication |                 |                    |
|----------------------------------------|--------------------------------------|----------------------------------------------------|-----------------------------|----------------------------|-----------------|--------------------|
|                                        |                                      | Updated Protocol                                   | Protected                   |                            |                 |                    |
|                                        | All Implanted<br>Patients<br>(N=150) | Cohort (after pre-<br>stenting allowed)<br>(N=115) | Conduit<br>Cohort<br>(N=81) | Regurgitation<br>(N=80)    | Mixed<br>(N=31) | Stenosis<br>(N=39) |
| Male                                   | 96 (64%)                             | 70 (61%)                                           | 48 (59%)                    | 49 (61%)                   | 19 (61%)        | 28 (72%)           |
| Age (years)                            | 19 (15, 26)                          | 19 (14, 29)                                        | 21 (14, 31)                 | 21 (16, 29)                | 17 (14, 23)     | 17 (14, 24)        |
| ≤21years old                           | 90 (60%)                             | 65 (57%)                                           | 44 (54%)                    | 41 (51%)                   | 23 (74%)        | 26 (67%)           |
| >21 years old                          | 60 (40%)                             | 50 (44%)                                           | 37 (46%)                    | 39 (49%)                   | 8 (26%)         | 13 (33%)           |
| Weight (kg)                            | 63 (51, 76)                          | 63 (50, 78)                                        | 62 (50, 74)                 | 64 (56, 77)                | 60 (45, 71)     | 63 (47, 79)        |
| Original Diagnosis                     |                                      |                                                    |                             |                            |                 |                    |
| Tetralogy of Fallot                    | 77 (51%)                             | 58 (50%)                                           | 42 (52%)                    | 49 (61%)                   | 15 (48%)        | 13 (33%)           |
| Aortic valve disease<br>(Ross)         | 31 (21%)                             | 26 (23%)                                           | 12 (15%)                    | 12 (15%)                   | 5 (16%)         | 14 (36%)           |
| Truncus arteriosus                     | 15 (10%)                             | 10 (9%)                                            | 9 (11%)                     | 5 (6%)                     | 4 (13%)         | 6 (15%)            |
| Transposition of the Great<br>Arteries | 16 (11%)                             | 13 (11%)                                           | 13 (16%)                    | 7 (9%)                     | 5 (16%)         | 4 (10%)            |
| Other Diagnosis                        | 11 (7%)                              | 8 (7%)                                             | 5 (6%)                      | 7 (9%)                     | 2 (7%)          | 2 (5%)             |
| NYHA                                   |                                      |                                                    |                             |                            |                 |                    |
| I                                      | 21 (14%)                             | 14 (12%)                                           | 10 (12%)                    | 6 (8%)                     | 3 (10%)         | 12 (31%)           |
| II                                     | 104 (69%)                            | 81 (70%)                                           | 56 (69%)                    | 55 (69%)                   | 26 (84%)        | 23 (59%)           |
| III                                    | 24 (16%)                             | 19 (17%)                                           | 15 (19%)                    | 18 (23%)                   | 2 (7%)          | 4 (10%)            |
| IV                                     | 1 (1%)                               | 1 (1%)                                             | 0 (0%)                      | 1 (1%)                     | 0 (0%)          | 0 (0%)             |

| Variable                              | Primary Implant Indication           |                                                                        |                                          |                         |                 |                    |
|---------------------------------------|--------------------------------------|------------------------------------------------------------------------|------------------------------------------|-------------------------|-----------------|--------------------|
|                                       | All Implanted<br>Patients<br>(N=150) | Updated Protocol<br>Cohort (after pre-<br>stenting allowed)<br>(N=115) | Protected<br>Conduit<br>Cohort<br>(N=81) |                         |                 |                    |
|                                       |                                      |                                                                        |                                          | Regurgitation<br>(N=80) | Mixed<br>(N=31) | Stenosis<br>(N=39) |
| # of previous open-heart<br>surgeries | 2 (2, 3)                             | 2 (2, 3)                                                               | 2 (2, 3)                                 | 2 (2, 3)                | 2 (1, 3)        | 2 (2, 3)           |
| RVOT conduit type                     |                                      |                                                                        |                                          |                         |                 |                    |
| Homograft                             | 109 (73%)                            | 81 (70%)                                                               | 45 (56%)                                 | 55 (69%)                | 23 (74%)        | 31 (80%)           |
| Biological valved conduit             | 19 (13%)                             | 16 (14%)                                                               | 19 (24%)                                 | 11 (14%)                | 2 (7%)          | 6 (15%)            |
| Bioprosthesis within the<br>RVOT      | 11 (7%)                              | 10 (9%)                                                                | 11 (14%)                                 | 7 (9%)                  | 3 (10%)         | 1 (3%)             |
| Other                                 | 11 (7%)                              | 8 (7%)                                                                 | 6 (7%)                                   | 7 (9%)                  | 3 (10%)         | 1 (3%)             |
| Primary Indication                    |                                      |                                                                        |                                          |                         |                 |                    |
| Stenosis                              | 39 (26%)                             | 34 (30%)                                                               | 25 (31%)                                 | 0 (0%)                  | 0 (0%)          | 39 (100%)          |
| Regurgitant                           | 80 (53%)                             | 58 (50%)                                                               | 38 (47%)                                 | 80 (100%)               | 0 (0%)          | 0 (0%)             |
| Mixed                                 | 31 (21%)                             | 23 (20%)                                                               | 18 (22%)                                 | 0 (0%)                  | 31 (100%)       | 0 (0%)             |
| Pre-existing stent in RVOT<br>conduit |                                      |                                                                        |                                          |                         |                 |                    |
| No pre-existing stents                | 113 (75%)                            | 93 (81%)                                                               | 66 (82%)                                 | 52 (65%)                | 22 (71%)        | 39 (100%)          |
| Single stent                          | 24 (16%)                             | 12 (10%)                                                               | 10 (12%)                                 | 18 (23%)                | 6 (19%)         | 0 (0%)             |
| Multiple stents                       | 13 (9%)                              | 10 (9%)                                                                | 5 (6%)                                   | 10 (13%)                | 3 (10%)         | 0 (0%)             |
| Delivery system size (mm)             |                                      |                                                                        |                                          |                         |                 |                    |
| 18mm                                  | 23 (15%)                             | 8 (7%)                                                                 | 6 (7%)                                   | 12 (15%)                | 5 (16%)         | 6 (15%)            |
| 20mm                                  | 41 (27%)                             | 33 (29%)                                                               | 25 (31%)                                 | 19 (24%)                | 11 (36%)        | 11 (28%)           |
| 22mm                                  | 86 (57%)                             | 74 (64%)                                                               | 50 (62%)                                 | 49 (61%)                | 15 (48%)        | 22 (56%)           |
| Post-implant dilation<br>performed    | 69 (46%)                             | 42 (37%)                                                               | 31 (38%)                                 | 35 (44%)                | 11 (36%)        | 23 (59%)           |



| Variable                               | Primary Implant Indication           |                                                    |                             |                         |                 |                    |
|----------------------------------------|--------------------------------------|----------------------------------------------------|-----------------------------|-------------------------|-----------------|--------------------|
|                                        | All Implanted<br>Patients<br>(N=150) | Updated Protocol                                   | Protected                   |                         |                 |                    |
|                                        |                                      | Cohort (after pre-<br>stenting allowed)<br>(N=115) | Conduit<br>Cohort<br>(N=81) | Regurgitation<br>(N=80) | Mixed<br>(N=31) | Stenosis<br>(N=39) |
| Pre-implant peak RVOT<br>gradient      | 37 (22, 47)                          | 37 (20, 47)                                        | 39 (26, 48)                 | 26 (16, 41)             | 43 (31, 50)     | 45 (40, 51)        |
| Post-implant peak RVOT<br>gradient     | 13 (9, 17)                           | 11 (8, 16)                                         | 11 (8, 16)                  | 12 (7, 17)              | 13 (10, 17)     | 14 (10, 19)        |
| Discharge mean Doppler<br>gradient     | 17 (12, 22)                          | 17 (12, 21)                                        | 17 (12, 21)                 | 16 (11, 21)             | 18 (13, 21)     | 20 (16, 24)        |
| Post-implant peak gradient<br>>15mm Hg | 53 (35%)                             | 32 (28%)                                           | 23 (28%)                    | 23 (29%)                | 13 (42%)        | 17 (44%)           |
| Hospital stay >1 day                   | 15 (10%)                             | 12 (10%)                                           | 10 (12%)                    | 9 (11%)                 | 2 (6%)          | 4 (10%)            |

Values are no. (%) or median (Q1, Q3).

Table S3. CPET results over time – Implanted &gt;24 hours Cohort (N=149)

|                                      | <b>Pre-Implant<br/>(N=121)</b> | <b>6-Months<br/>(N=116)</b> | <b>1 Year<br/>(N=114)</b>  | <b>2 Year<br/>(N=109)</b>  | <b>3 Year<br/>(N=88)</b>  | <b>4 Year<br/>(N=75)</b>  | <b>5 Year<br/>(N=70)</b> |
|--------------------------------------|--------------------------------|-----------------------------|----------------------------|----------------------------|---------------------------|---------------------------|--------------------------|
| <b>Peak VO2 Achieved (ml/kg/min)</b> |                                |                             |                            |                            |                           |                           |                          |
| NYHA I or II                         | 23.9 [19.4, 29.0]<br>(119)     | 24.9 [19.6, 30.0]<br>(115)  | 24.0 [18.1, 30.0]<br>(114) | 23.8 [19.1, 27.9]<br>(107) | 24.3 [18.6, 29.8]<br>(88) | 23.6 [20.0, 30.1]<br>(75) | 23.7 [17.7, 29.6] (69)   |
| NYHA III or IV                       | 15.7 [12.3, 19.6]<br>(24)      | 17.6 [15.4, 21.1]<br>(21)   | 16.2 [14.3, 19.9]<br>(18)  | 16.5 [15.0, 19.2]<br>(18)  | 16.4 [12.0, 19.9]<br>(15) | 18.3 [14.1, 20.1]<br>(14) | 17.7 [14.8, 20.1] (11)   |
| <b>% Predicted VO2 Achieved</b>      |                                |                             |                            |                            |                           |                           |                          |
| NYHA I or II                         | 60 [48, 71] (119)              | 61 [51, 76] (115)           | 61 [47, 75] (114)          | 63 [50, 73] (107)          | 61 [47, 73] (84)          | 61 [51, 74] (74)          | 64 [52, 74] (65)         |
| NYHA III or IV                       | 43 [36, 57] (24)               | 56 [42, 71] (21)            | 50 [38, 63] (18)           | 54 [38, 62] (18)           | 49 [37, 70] (15)          | 52 [46, 66] (13)          | 50 [42, 63] (11)         |
| <b>AT (ml/kg/min)</b>                |                                |                             |                            |                            |                           |                           |                          |
| NYHA I or II                         | 15.5 [11.6, 20.8]<br>(112)     | 15.7 [11.8, 19.0]<br>(111)  | 15.0 [11.6, 19.4]<br>(110) | 14.5 [11.7, 18.4]<br>(103) | 14.6 [11.2, 19.0]<br>(86) | 15.5 [11.5, 18.0]<br>(74) | 14.5 [11.7, 16.8] (65)   |
| NYHA III or IV                       | 13.3 [10.3, 15.7]<br>(17)      | 12.2 [10.4, 15.2]<br>(19)   | 11.0 [9.1, 12.4]<br>(15)   | 10.9 [9.9, 13.1]<br>(17)   | 11.3 [9.2, 14.9]<br>(14)  | 12.8 [10.4, 14.6]<br>(14) | 12.3 [10.7, 14.6] (11)   |
| <b>% Predicted AT</b>                |                                |                             |                            |                            |                           |                           |                          |
| NYHA I or II                         | 40 [33, 52] (112)              | 39 [32, 48] (111)           | 39 [30, 49] (110)          | 38 [31, 45] (102)          | 37 [28, 50] (83)          | 38 [32, 45] (72)          | 37 [31, 45] (62)         |
| NYHA III or IV                       | 35 [32, 41] (17)               | 36 [31, 54] (19)            | 31 [27, 43] (16)           | 33 [26, 40] (17)           | 35 [30, 43] (14)          | 35 [32, 43] (12)          | 32 [26, 48] (11)         |
| <b>VE/VCO2 at AT</b>                 |                                |                             |                            |                            |                           |                           |                          |
| NYHA I or II                         | 30 [28, 33] (112)              | 29 [26, 31] (111)           | 29 [27, 32] (110)          | 29 [27, 32] (103)          | 29 [27, 31] (86)          | 28 [25, 30] (72)          | 28 [26, 31] (64)         |
| NYHA III or IV                       | 35 [30, 38] (17)               | 30 [27, 36] (19)            | 31 [29, 33] (15)           | 30 [28, 33] (17)           | 31 [29, 36] (14)          | 30 [27, 33] (13)          | 29 [25, 30] (11)         |
| <b>RER at Peak VO2</b>               |                                |                             |                            |                            |                           |                           |                          |
| NYHA I or II                         | 1.1 [1.0, 1.2] (119)           | 1.1 [1.1, 1.2] (115)        | 1.1 [1.1, 1.2]<br>(114)    | 1.1 [1.1, 1.2] (107)       | 1.2 [1.1, 1.2] (88)       | 1.2 [1.1, 1.3] (73)       | 1.2 [1.1, 1.3] (68)      |

|                                                     | <b>Pre-Implant<br/>(N=121)</b> | <b>6-Months<br/>(N=116)</b> | <b>1 Year<br/>(N=114)</b> | <b>2 Year<br/>(N=109)</b> | <b>3 Year<br/>(N=88)</b> | <b>4 Year<br/>(N=75)</b> | <b>5 Year<br/>(N=70)</b> |
|-----------------------------------------------------|--------------------------------|-----------------------------|---------------------------|---------------------------|--------------------------|--------------------------|--------------------------|
| NYHA III or IV                                      | 1.1 [1.0, 1.2] (24)            | 1.2 [1.1, 1.2] (21)         | 1.1 [1.0, 1.2] (18)       | 1.1 [1.0, 1.2] (18)       | 1.1 [1.0, 1.2] (15)      | 1.1 [1.1, 1.2] (14)      | 1.1 [1.1, 1.2] (11)      |
| <b>% Predicted Forced Vital Capacity (FVC)</b>      |                                |                             |                           |                           |                          |                          |                          |
| NYHA I or II                                        | 80 [69, 91] (118)              | 79 [70, 93] (115)           | 81 [69, 94] (113)         | 82 [71, 94] (104)         | 84 [70, 97] (87)         | 81 [72, 95] (75)         | 80 [69, 94] (69)         |
| NYHA III or IV                                      | 65 [40, 79] (24)               | 72 [39, 85] (21)            | 65 [38, 83] (18)          | 73 [40, 81] (18)          | 63 [39, 78] (15)         | 67 [42, 78] (14)         | 63 [44, 82] (11)         |
| <b>% Predicted Forced Expiration Volume (1 sec)</b> |                                |                             |                           |                           |                          |                          |                          |
| NYHA I or II                                        | 77 [64, 90] (118)              | 81 [67, 92] (115)           | 82 [67, 91] (113)         | 80 [67, 92] (104)         | 83 [66, 92] (87)         | 82 [65, 94] (75)         | 80 [67, 89] (69)         |
| NYHA III or IV                                      | 56 [40, 76] (24)               | 68 [37, 77] (21)            | 59 [35, 79] (18)          | 64 [37, 73] (18)          | 53 [38, 68] (15)         | 56 [36, 76] (14)         | 55 [46, 74] (11)         |
| <b>Peak Heart Rate</b>                              |                                |                             |                           |                           |                          |                          |                          |
| NYHA I or II                                        | 157 [144, 173]<br>(121)        | 159 [144, 174]<br>(116)     | 158 [137, 173]<br>(114)   | 160 [135, 172]<br>(108)   | 155 [141, 176]<br>(88)   | 162 [145, 173]<br>(75)   | 154 [132, 180] (70)      |
| NYHA III or IV                                      | 132 [122, 161]<br>(24)         | 146 [125, 158] (21)         | 131 [116, 158]<br>(18)    | 133 [108, 148]<br>(18)    | 129 [126, 148]<br>(15)   | 135 [126,162] (14)       | 141 [126, 162] (11)      |
| <b>Peak Workload</b>                                |                                |                             |                           |                           |                          |                          |                          |
| NYHA I or II                                        | 115 [76, 148]<br>(120)         | 124 [81, 160] (116)         | 121 [87, 159]<br>(114)    | 122 [97, 162]<br>(106)    | 132 [101, 175]<br>(88)   | 136 [103, 182]<br>(75)   | 136 [102, 176] (69)      |
| NYHA III or IV                                      | 73 [51, 107] (24)              | 92 [68, 116] (21)           | 73 [58, 123] (18)         | 76 [60, 119] (18)         | 73 [47, 120] (15)        | 76 [65, 115] (14)        | 88 [71, 135] (10)        |
| <b>Peak Oxygen Pulse</b>                            |                                |                             |                           |                           |                          |                          |                          |
| NYHA I or II                                        | 9.0 [7.0, 12.0]<br>(119)       | 10.0 [7.0, 12.0]<br>(115)   | 10.0 [7.0, 12.0]<br>(114) | 10.0 [8.0, 12.5]<br>(108) | 10.7 [8.0, 13.8]<br>(88) | 10.3 [8.1, 14.0]<br>(75) | 11.0 [8.3, 14.0] (69)    |
| NYHA III or IV                                      | 7.5 [6.5, 10.5] (24)           | 9.0 [7.0, 11.0] (21)        | 8.0 [7.0, 11.0]<br>(18)   | 8.0 [7.0, 12.7] (18)      | 7.9 [6.3, 9.5] (15)      | 8.0 [6.5, 11.0] (14)     | 9.0 [6.0, 11.0] (11)     |
| <b>% Predicted Peak Expiratory Flow Rate</b>        |                                |                             |                           |                           |                          |                          |                          |
| NYHA I or II                                        | 79 [59, 96] (112)              | 80 [60, 95] (115)           | 80 [64, 99] (111)         | 82 [63, 95] (104)         | 82 [65, 94] (87)         | 86 [67, 96] (74)         | 82 [61, 93] (68)         |

|                | <b>Pre-Implant<br/>(N=121)</b> | <b>6-Months<br/>(N=116)</b> | <b>1 Year<br/>(N=114)</b> | <b>2 Year<br/>(N=109)</b> | <b>3 Year<br/>(N=88)</b> | <b>4 Year<br/>(N=75)</b> | <b>5 Year<br/>(N=70)</b> |
|----------------|--------------------------------|-----------------------------|---------------------------|---------------------------|--------------------------|--------------------------|--------------------------|
| NYHA III or IV | 62 [44, 81] (23)               | 63 [54, 80] (21)            | 61 [45, 75] (18)          | 67 [49, 74] (18)          | 56 [45, 72] (15)         | 58 [52, 83] (14)         | 58 [50, 76] (11)         |

Values are median [Q1, Q3] (n).

Table S4.

Pre-implant and 6-month site CMR imaging data in patients implanted &gt;24 hours

| Variable <sup>1</sup>            | PR Indication          |                        |         | Mixed Indication       |                        |         | Stenosis Indication    |                        |         |
|----------------------------------|------------------------|------------------------|---------|------------------------|------------------------|---------|------------------------|------------------------|---------|
|                                  | Pre-implant            | 6 Months               | P value | Pre-implant            | 6 Months               | P value | Pre-implant            | 6 Months               | P value |
| PR Fraction (%)                  | 35 (26, 43)<br>[50]    | 0.0 (0.0, 2.8)<br>[52] | <0.001  | 16 (12, 28)<br>[26]    | 1.2 (0.0, 2.6)<br>[22] | <0.001  | 7.9 (0.7, 15)<br>[30]  | 1.1 (0.0, 3.2)<br>[33] | 0.005   |
| RVEDV (ml)                       | 215 (168, 285)<br>[59] | 174 (143, 222)<br>[56] | <0.001  | 186 (152, 249)<br>[27] | 167 (130, 187)<br>[24] | <0.001  | 181 (130, 214)<br>[33] | 152 (126, 200)<br>[34] | 0.003   |
| RVEDV Index (ml/m <sup>2</sup> ) | 128 (108, 169)<br>[59] | 101 (85, 133)<br>[56]  | <0.001  | 119 (104, 148)<br>[27] | 99 (83, 124)<br>[24]   | <0.001  | 97 (82, 123)<br>[33]   | 94 (75, 109)<br>[33]   | 0.001   |
| RVEF (%)                         | 51 (43, 58)<br>[59]    | 48 (41, 57)<br>[56]    | 0.064   | 46 (37, 60)<br>[27]    | 53 (44, 58)<br>[24]    | 0.107   | 51 (45, 55)<br>[33]    | 52 (45, 59)<br>[33]    | 0.77    |
| LVEDV (ml)                       | 130 (105, 172)<br>[58] | 151 (125, 181)<br>[53] | 0.001   | 130 (94, 158)<br>[27]  | 141 (116, 170)<br>[24] | 0.021   | 139 (102, 168)<br>[33] | 166 (110, 179)<br>[34] | 0.001   |
| LVEDV Index (ml/m <sup>2</sup> ) | 80 (68, 96)<br>[58]    | 88 (76, 98)<br>[53]    | 0.007   | 78 (69, 91)<br>[27]    | 89 (78, 101)<br>[24]   | 0.049   | 80 (66, 95)<br>[33]    | 90 (71, 98)<br>[33]    | 0.005   |
| LVEF (%)                         | 58 (52, 62)<br>[58]    | 59 (54, 63)<br>[53]    | 0.386   | 56 (50, 62)<br>[27]    | 58 (54, 64)<br>[24]    | 0.220   | 63 (57, 69)<br>[33]    | 62 (59, 67)<br>[34]    | 0.90    |

<sup>1</sup>Data after TPV-in-TPV or explant are excluded.

Values are median (Q1, Q3) [n]. P values reflect paired comparisons.
